# Supplementary material for: Ag/Pd bimetallic nanoparticle-loaded Zr-MOF: an efficacious visible-light-responsive photocatalyst for H2O2 and H2 production
Source: Royal Society of Chemistry journal article supplement (doi:10.1039/d3ya00597f), 2024-01-01
Supplement: d3ya00597f1.pdf [file d3ya00597f1.pdf]

## Supporting Information

### **Ag/Pd bimetallic nanoparticles loaded Zr-MOF: An efficacious visible light responsive photocatalyst towards H<sub>2</sub>O<sub>2</sub> and H<sub>2</sub> production**

Srabani Dash<sup>a</sup>, Suraj Prakash Tripathy<sup>a</sup>, Satyabrata Subudhi<sup>a</sup>, Lopamudra Acharya<sup>a</sup>, Asheli Ray<sup>a</sup>, Pragyandeepti Behera<sup>a</sup>, Kulamani Parida<sup>a\*</sup>

<sup>a</sup> Centre for Nano Science and Nanotechnology, Siksha 'O' Anusnadhan (Deemed to be University), Bhubaneswar, Odisha, 751030, India

(\*Corresponding Author)

---

*(The following electronic supporting information contains 8 pages, 04 tables, and 5 figures.)*

---

\* Corresponding author E-mail: [paridakulamani@yahoo.com](mailto:paridakulamani@yahoo.com), [kulamaniparida@soa.ac.in](mailto:kulamaniparida@soa.ac.in),

Tel. No. +91-674-2351777, Fax. +91-674-2350642

## **1. Experimental Techniques:**

### **1.1. Characterization Techniques:**

The powder X-ray diffraction (PXRD) analysis was carried out by using Rigaku Ultima-IV (40 kV-40 mA) which is connected with Cu K $\alpha$  source having radiation ( $\lambda = 0.154$  nm) at  $2\theta$  range ( $5^\circ$ - $80^\circ$ ) to detect the crystallinity and phase purity properties of the material. Fourier transform infrared (FTIR) spectrometer analysis was carried out with JASCO FTIR-4600-LE taking KBr (potassium bromide) as reference for interpretation of the functional groups of synthesized materials between the range of  $4000$ - $400$   $\text{cm}^{-1}$ . To determine the oxidation states and chemical composition of the materials X-ray photoelectron spectroscopy (XPS) analysis was performed by VG-microtech-multilab-ESCA-3000 spectrometer (Mg-K-X-ray non-monochromatized source). By the Brunauer–Emmett–Teller (BET) surface area analysis and the  $\text{N}_2$  adsorption-desorption evaluation materials textural properties were measured using NOVA-2200e Quantachrome analyser. The surface morphology was analyzed by scanning electron microscopy (SEM) with 200 kV JEOL-JEM-2100 that was coupled with energy-dispersive X-ray (EDS) and elemental mapping analysis apparatus respectively and the internal topology of the produced photocatalysts, were analyzed through transmission electron microscopy (TEM) by ZEISS SUPRA-55. The optical characteristics of the synthesized samples were measured using a JASCO-V-750 UV-Visible spectrophotometer with  $\text{BaSO}_4$  reference in the wavelength range (200-800 nm). The excitation and emission spectra of photoluminescence (PL) were measured using a JASCO FP-8300 fluorescence spectrometer using Xenon lamp as the light source with an excitation wavelength of 325 nm. The TRPL analysis was carried out by Edinburgh-FLS920 Fluorescence spectrometer which is coupled with a multi-channel scaling (MCS) module fitted to the F290H pulsed Xe microsecond flash lamp source. Electrochemical properties of the prepared materials were characterized by using IVIUMnSTAT multi-channel analyzer. Furthermore, Agilent Technology gas-chromatography was used to analyze the evolution of  $\text{H}_2$  (GC-7890B). An ICP-OES elemental analyzer (Elementar Vario EL III Carlo Erba 1108) was used to determine the loading percentage of the elements present.

**1.2. FTO Preparation:** Additionally, the prepared materials were dropcastingly deposited on the fluorine-doped tin oxide (FTO) glass. Firstly, the FTO glasses were ultrasonically washed with DI and ethanol for 20 min each and then dried at  $75^\circ\text{C}$ . The suspension which comprised of distilled water (1.6 mL), ethanol (1.4 mL) and Nafion (40  $\mu\text{L}$ ) was uniformly coated on the conducting surface of FTO. The Ag/AgCl taken as reference electrode, Pt electrode used as

counter electrode, and the sample coated FTO as working electrode were installed three electrode based electrochemical cell and by taking  $\text{Na}_2\text{SO}_4$  (0.2 M) as electrolyte.

**1.3. Scavenger Test Procedure:** Radical scavenger tests were carried out to clarify the reactive species in charge of the production of  $\text{H}_2\text{O}_2$  by (1:2)  $\text{Ag/Pd@UiO-66-NH}_2$  under light illumination. These experiments are depicted in (Fig. S4) The influence of  $\cdot\text{O}_2^-$ ,  $\text{OH}\cdot$ ,  $\text{h}^+$ , and  $\text{e}^-$  species on photocatalytic  $\text{H}_2\text{O}_2$  formation was investigated using 1,4-benzoquinone (PBQ), isopropanol (IPA), citric acid (CA), and dimethyl sulfoxide (DMSO), in that order. When PBQ and DMSO were introduced to the photocatalytic system, the yield of  $\text{H}_2\text{O}_2$  was dramatically reduced, confirming the considerable contribution of both  $\cdot\text{O}_2^-$  and  $\text{e}^-$  via indirect and direct  $\text{O}_2$  reduction routes. Also, the addition of IPA showed a significant impact on  $\text{H}_2\text{O}_2$  production which exhibit the remarkable role of  $\text{OH}\cdot$  radicals. Moreover, the significant  $\text{H}_2\text{O}_2$  yield delay caused by the addition of CA showed a minor involvement of  $\text{h}^+$  radicals as reactive intermediate species during the photocatalytic  $\text{H}_2\text{O}_2$  production process.

**Fig S1:** BET surface area (Inset: BJH pore size distribution) of (1:2)  $\text{Ag/Pd@UiO-66-NH}_2$

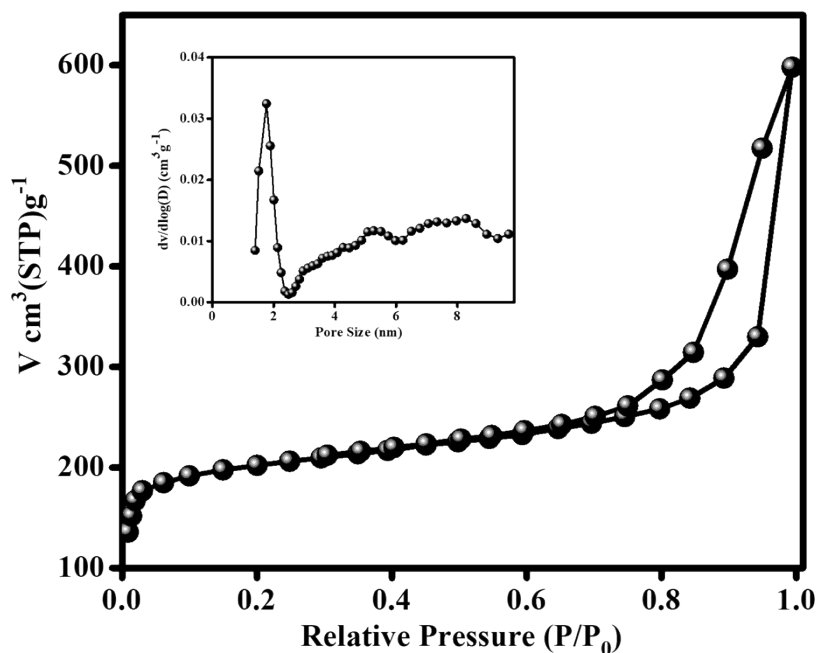

**Fig. S2:** Survey XPS spectrum of pristine UiO-66-NH<sub>2</sub> and composite (1:2) Ag/Pd@UiO-66-NH<sub>2</sub>

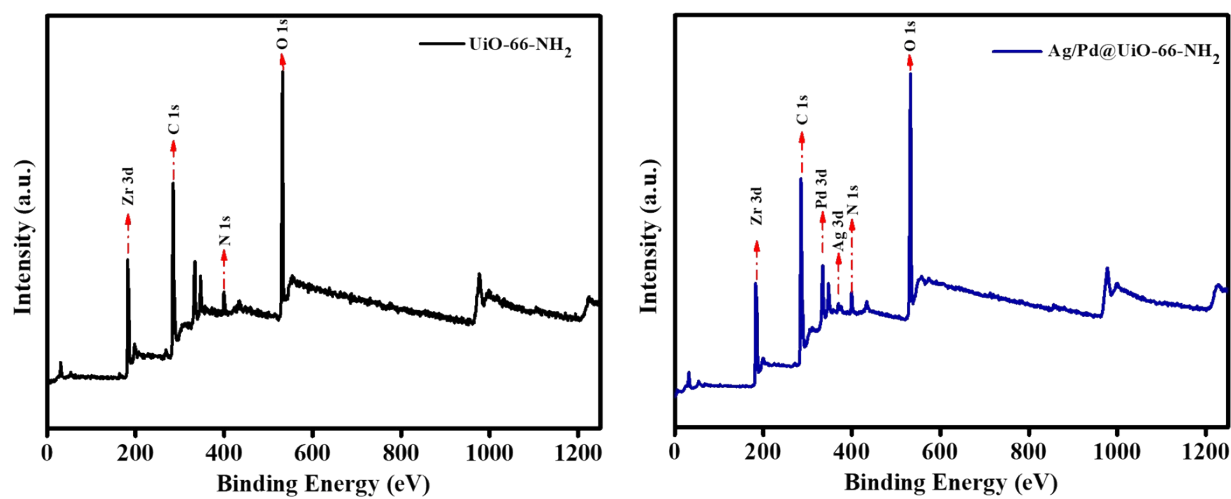

**Fig. S3:** PL plot for pristine UiO-66-NH<sub>2</sub> and (1:1, 1:2, 2:1) Ag/Pd@UiO-66-NH<sub>2</sub>

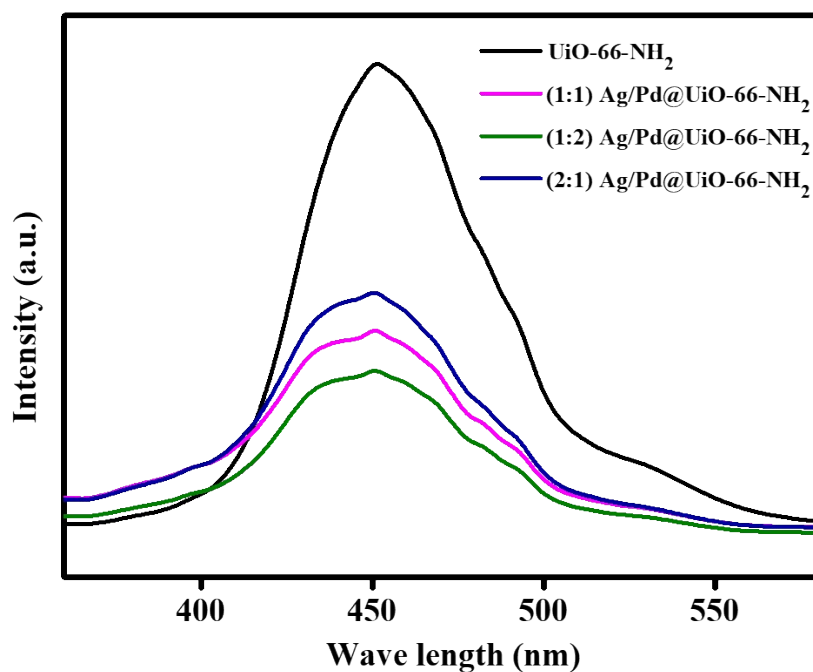

Fig. S4: TRPL plot of (1:2) Ag/Pd@UiO-66-NH<sub>2</sub>

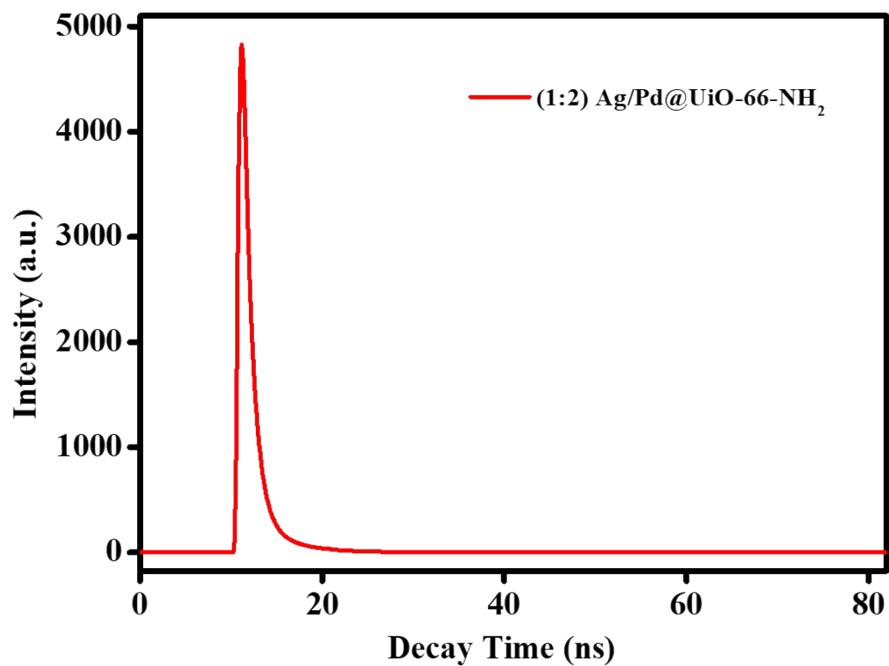

Fig. S5: LSV plot of the prepared photocatalysts

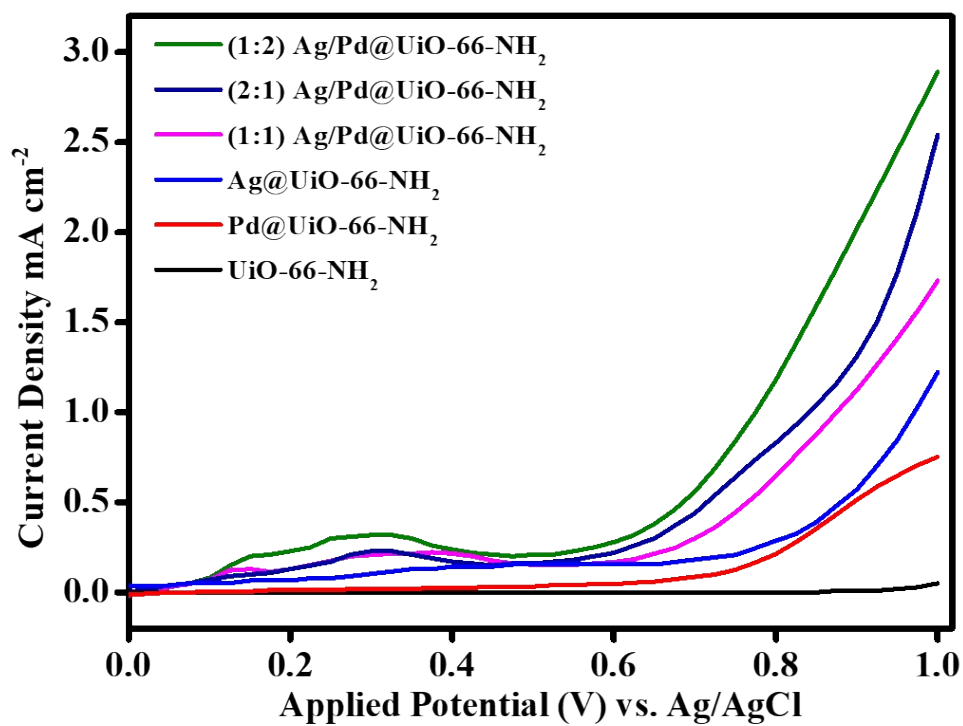

**Fig. S6:** Post photo-catalytic PXRD analysis

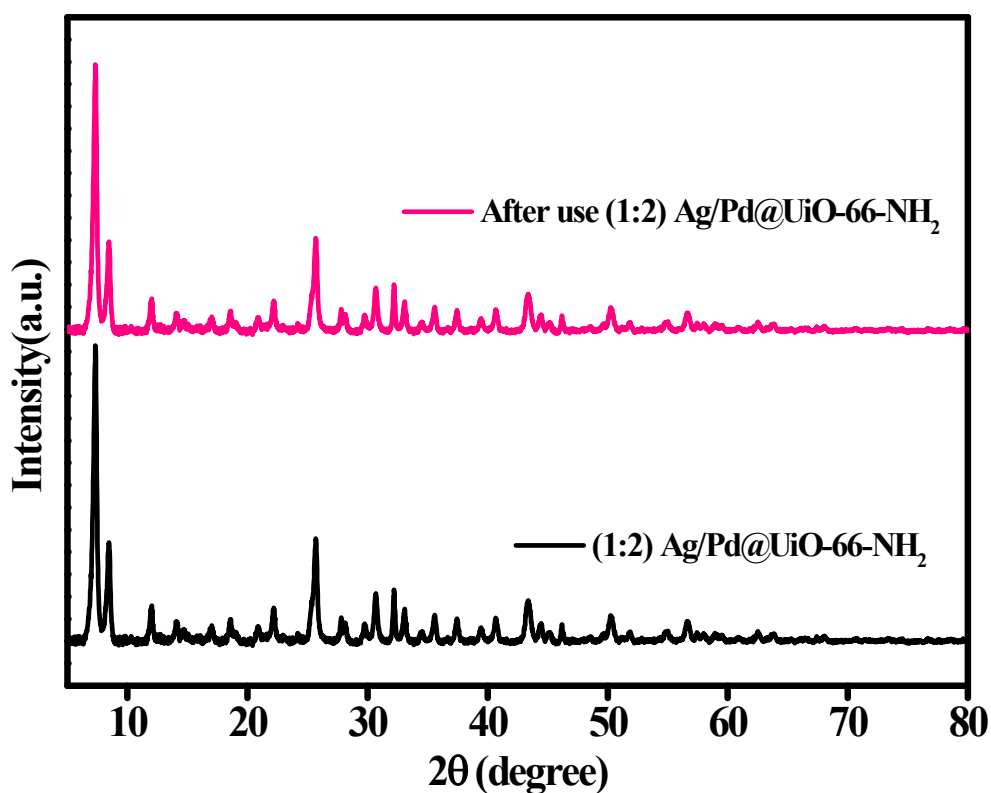

**Table S1:** TRPL fitting data and average life times of the prepared MOFs

| Sample Name                        | $\tau_1$ | $\tau_2$ | A1      | A2    | $\tau_{avg}$ | Ref.              |
|------------------------------------|----------|----------|---------|-------|--------------|-------------------|
| UiO-66-NH <sub>2</sub>             | 0.36     | 4.81     | 6600.48 | 16.40 | 0.504        | <sup>1</sup>      |
| (1:2) Ag/Pd@UiO-66-NH <sub>2</sub> | 0.81     | 6.82     | 63.6    | 21.76 | 0.537        | <i>This study</i> |

**Table S2:** Apparent Conversion Efficiency (ACE) Expression and Calculation for photocatalytic hydrogen evolution by the prepared photocatalysts

| ACE Expression                                                                                                                                                                                                                                                                                                                                                                         | ACE Value                                                |
|----------------------------------------------------------------------------------------------------------------------------------------------------------------------------------------------------------------------------------------------------------------------------------------------------------------------------------------------------------------------------------------|----------------------------------------------------------|
| $ACE(H_2) = \frac{\text{stored chemical energy (SCE)}}{\text{incident light intensity (ILI)}}$                                                                                                                                                                                                                                                                                         | ACE <sub>(UNH)</sub> : 0.88 %                            |
| $ACE(H_2) = \frac{\text{moles of H produced (in } \mu\text{mol/s}) \times \Delta H_c}{150\text{mW cm}^{-2} \times (\text{area of the spherical surface on which})}$ <p>[<math>\Delta H_c</math> = Heat of Combustion (kJ mol<sup>-1</sup>) for H<sub>2</sub> = 2H<sup>+</sup> + ½ O<sub>2</sub>; <math>\Delta H_c</math> = 285.8 kJ mol<sup>-1</sup>, r = Circle radius = 1.5 cm.]</p> | ACE <sub>(1:2)Ag/Pd@UiO-66-NH<sub>2</sub></sub> : 3.30 % |

**Table S3:** Comparative table for photocatalytic H<sub>2</sub>O<sub>2</sub> production by various photocatalysts

| Sl. No. | Material Name                                                                   | Light Source                        | H <sub>2</sub> O <sub>2</sub> Production    | Ref.              |
|---------|---------------------------------------------------------------------------------|-------------------------------------|---------------------------------------------|-------------------|
| 1.      | Hexagonal rosettes g-C <sub>3</sub> N <sub>4</sub>                              | Visible light ( $\lambda > 420$ nm) | 150 $\mu\text{mol h}^{-1} \text{g}^{-1}$    | 2                 |
| 2.      | CoP/g-C <sub>3</sub> N <sub>4</sub>                                             | Visible light ( $\lambda > 420$ nm) | 140 $\mu\text{mol}$ in 2 h                  | 3                 |
| 3.      | PEI/g-C <sub>3</sub> N <sub>4</sub>                                             | Visible light ( $\lambda > 420$ nm) | 208.1 $\mu\text{mol h}^{-1} \text{g}^{-1}$  | 4                 |
| 4.      | Bi <sub>4</sub> O <sub>5</sub> Br <sub>2</sub> /g-C <sub>3</sub> N <sub>4</sub> | Visible light ( $\lambda > 420$ nm) | 124 $\mu\text{mol h}^{-1}$                  | 5                 |
| 5.      | CdS/rGO                                                                         | Sun light                           | 164 $\mu\text{mol h}^{-1}$                  | 6                 |
| 6.      | Ti <sub>3</sub> C <sub>2</sub> /TiO <sub>2</sub>                                | Visible light ( $\lambda > 420$ nm) | 179.7 $\mu\text{mol L}^{-1} \text{h}^{-1}$  | 7                 |
| 7.      | Ag/ZnFe <sub>2</sub> O <sub>4</sub> -Ag-Ag <sub>3</sub> PO <sub>4</sub>         | Visible light ( $\lambda > 420$ nm) | 206.3 $\mu\text{mol L}^{-1}$                | 8                 |
| 8.      | O-CNC                                                                           | Visible light ( $\lambda > 420$ nm) | 2008.4 $\mu\text{mol h}^{-1} \text{g}^{-1}$ | 9                 |
| 9.      | DCN-15A                                                                         | Visible light ( $\lambda > 420$ nm) | 12.1 $\mu\text{mol h}^{-1}$                 | 10                |
| 10.     | (1:2) Ag/Pd@UiO-66-NH <sub>2</sub>                                              | Visible light ( $\lambda > 420$ nm) | 39.4 $\mu\text{mol h}^{-1}$                 | <i>This study</i> |

**Table S4:** Comparative table for photocatalytic H<sub>2</sub> evolution by various photocatalysts

| Sl. No. | Material Name                                               | Light Source                           | H <sub>2</sub> Production                 | Ref. |
|---------|-------------------------------------------------------------|----------------------------------------|-------------------------------------------|------|
| 1.      | NU66/ZIS                                                    | 300 W Xe lamp ( $\lambda \geq 420$ nm) | 2199 $\mu\text{mol h}^{-1} \text{g}^{-1}$ | 11   |
| 2.      | Pt@UiO-66-NH <sub>2</sub> @ZnIn <sub>2</sub> S <sub>4</sub> | 300 W Xe lamp ( $\lambda \geq 420$ nm) | 850 $\mu\text{mol h}^{-1} \text{g}^{-1}$  | 12   |
| 3.      | Au <sub>4</sub> @UiOS@ZIS                                   | 300 W Xe lamp ( $\lambda \geq 420$ nm) | 391 $\mu\text{mol h}^{-1}$                | 13   |
| 4.      | PtNi/g-C <sub>3</sub> N <sub>4</sub>                        | 300 W Xe lamp ( $\lambda \geq 420$ nm) | 104.7 $\mu\text{mol h}^{-1}$              | 14   |
| 5.      | Ag-Pd/ZIS                                                   | 300 W Xe lamp ( $\lambda \geq 420$ nm) | 125.4 $\mu\text{mol h}^{-1}$              | 15   |

|     |                                          |                                        |                                             |                   |
|-----|------------------------------------------|----------------------------------------|---------------------------------------------|-------------------|
| 6.  | Cu-Pt/SrTiO <sub>3</sub>                 | Visible Light ( $\lambda \geq 420$ nm) | 369.4 $\mu\text{mol h}^{-1}$                | <sup>16</sup>     |
| 7.  | AuPd/g-C <sub>3</sub> N <sub>4</sub>     | Visible light ( $\lambda \geq 420$ nm) | 2145 $\text{mmol h}^{-1} \text{g}^{-1}$     | <sup>17</sup>     |
| 8.  | Au/g-C <sub>3</sub> N <sub>4</sub>       | Visible light ( $\lambda \geq 420$ nm) | 423.1 $\mu\text{mol h}^{-1}$                | <sup>18</sup>     |
| 9.  | CdS/PdAg/g-C <sub>3</sub> N <sub>4</sub> | 300 W Xe lamp ( $\lambda \geq 420$ nm) | 3098.3 $\mu\text{mol h}^{-1} \text{g}^{-1}$ | <sup>19</sup>     |
| 10. | (1:2) Ag/Pd@UiO-66-NH <sub>2</sub>       | 300 W Xe lamp/Visible Light            | 448.2 $\mu\text{mol h}^{-1}$                | <b>This study</b> |

## References:

- 1 S. P. Tripathy, S. Subudhi, A. Ray, P. Behera, J. Panda, S. Dash and K. Parida, *J Colloid Interface Sci*, 2023, **629**, 705–718.
- 2 T. Mahvelati-Shamsabadi, H. Fattahimoghaddam, B. K. Lee, S. Bae and J. Ryu, *J Colloid Interface Sci*, 2021, **597**, 345–360.
- 3 Y. Peng, L. Wang, Y. Liu, H. Chen, J. Lei and J. Zhang, *Eur J Inorg Chem*, 2017, **2017**, 4797–4802.
- 4 X. Zeng, Y. Liu, Y. Kang, Q. Li, Y. Xia, Y. Zhu, H. Hou, H. Uddin, T. R. Gengenbach, D. Xia, C. Sun, D. T. Mccarthy, A. Deletic, J. Yu and X. Zhang, *ACS Catal.* 2020, **6**, 3697–3706.
- 5 X. Zhao, Y. You, S. Huang, Y. Wu, Y. Ma, G. Zhang and Z. Zhang, *Appl Catal B*, 2020, **278**, 119251.
- 6 X. Li, D. Chen, N. Li, Q. Xu, H. Li and J. Lu, *J Colloid Interface Sci*, 2023, **648**, 664–673.
- 7 Y. Chen, W. Gu, L. Tan, Z. Ao, T. An and S. Wang, *Appl Catal A Gen*, 2021, **618**, 118127.
- 8 X. Ma and H. Cheng, *Chemical Engineering Journal*, 2022, **429**, 132373.
- 9 H. Xie, Y. Zheng, X. Guo, Y. Liu, Z. Zhang, J. Zhao, W. Zhang, Y. Wang and Y. Huang, *ACS Sustain Chem Eng*, 2021, **9**, 6788–6798.
- 10 L. Shi, L. Yang, W. Zhou, Y. Liu, L. Yin, X. Hai, H. Song and J. Ye, *Small*, 2018, **9**, 1703142.
- 11 C. Zhao, Y. Zhang, H. Jiang, J. Chen, Y. Liu, Q. Liang, M. Zhou, Z. Li and Y. Zhou, *Journal of Physical Chemistry C*, 2019, **123**, 18037–18049.



- 12 L. Wang, Y. Zhao, B. Zhang, G. Wu, J. Wu and H. Hou, *Catal Sci Technol*, 2023, **13**, 2517–2528.
- 13 S. Mao, J. W. Shi, G. Sun, D. Ma, C. He, Z. Pu, K. Song and Y. Cheng, *Appl Catal B*, 2021, **282**, 119550.
- 14 W. Peng, S. S. Zhang, Y. B. Shao and J. H. Huang, *Int J Hydrogen Energy*, 2018, **43**, 22215–22225.
- 15 C. Liu, Y. Zhang, J. Wu, H. Dai, C. Ma, Q. Zhang and Z. Zou, *J Mater Sci Technol*, 2022, **114**, 81–89.
- 16 L. Qin, G. Si, X. Li and S. Z. Kang, *RSC Adv*, 2015, **5**, 102593–102598.
- 17 C. Han, Y. Gao, S. Liu, L. Ge, N. Xiao, D. Dai, B. Xu and C. Chen, *Int J Hydrogen Energy*, 2017, **42**, 22765–22775.
- 18 X. B. Qian, W. Peng and J. H. Huang, *Mater Res Bull*, 2018, **102**, 362–368.
- 19 J. Gao, F. Zhang, H. Xue, L. Zhang, Y. Peng, X. L. Li, Y. Gao, N. Li and G. Lei, *Appl Catal B*, 2021, **281**, 119509.
